# Supplementary material for: Novel UIO-66-NO2@XC-72 nanohybrid as an electrode material for simultaneous detection of ascorbic acid, dopamine and uric acid
Source: Royal Society of Chemistry journal article supplement (doi:10.1039/c6ra26933h), 2017-01-01
Supplement: c6ra26933h1.pdf [file c6ra26933h1.pdf]

## Electronic Supplementary Material (ESI) for RSC Advances.

Novel UIO-66-NO<sub>2</sub>@XC-72 nanohybrid as electrode material for simultaneous detection of ascorbic acid, dopamine and uric acid

Wanqing Zhang,<sup>a, b</sup> Jun Chen,<sup>b</sup> Yuanchao Li,<sup>b</sup> Wenxiang Yang,<sup>b</sup> Yadong Zhang,<sup>\*a</sup> and Yuping Zhang<sup>\*b</sup>

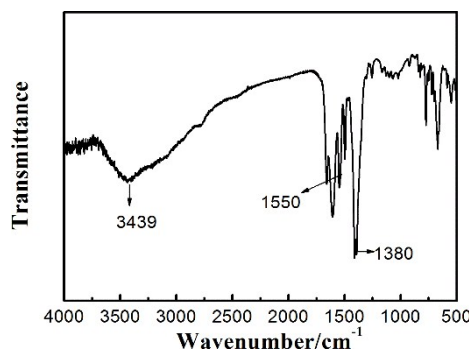

Fig. S1 The FTIR spectrum of UIO-66-NO<sub>2</sub>.

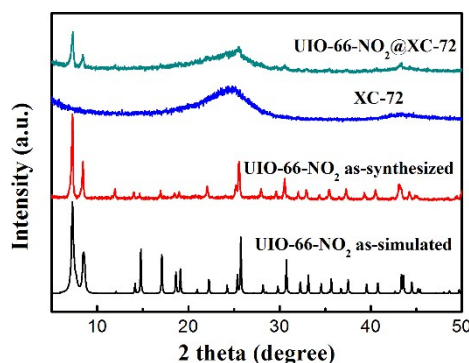

Fig. S2 XRD patterns of the obtained samples. Ratio of UIO-66-NO<sub>2</sub> and XC-72 was 1: 6 in the UIO-66-NO<sub>2</sub>@XC-72.

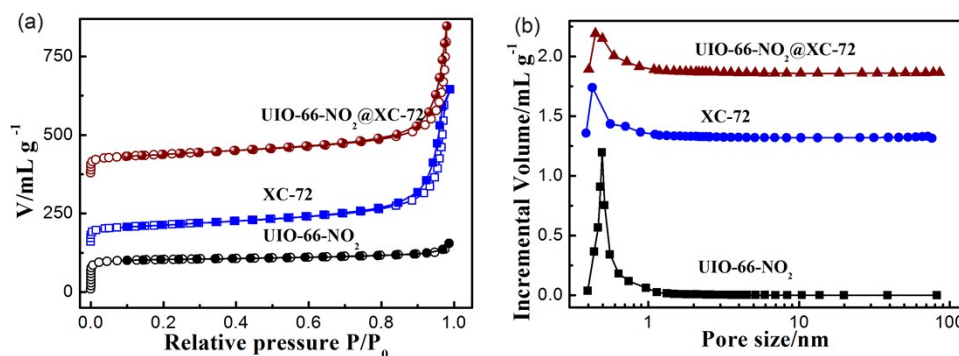

Fig. S3 (a) N<sub>2</sub> adsorption-desorption isotherms and (b) Pore-size distributions of the obtained samples. Ratio of UIO-66-NO<sub>2</sub> and XC-72 was 1: 6 in the UIO-66-NO<sub>2</sub>@XC-72.
